# Supplementary material for: Broad-Spectrum Antiviral Activity of 3D8, a Nucleic Acid-Hydrolyzing Single-Chain Variable Fragment (scFv), Targeting SARS-CoV-2 and Multiple Coronaviruses In Vitro
Source: MDPI journal article supplement (doi:10.3390/v13040650), 2021-04-09
Supplement: s1 [file s1]

**Supplement table 2. Primers used for RT-qPCR of SARS-CoV-2, HCoV-OC43, and PEDV**

| <b>Primer</b>                     | <b>Sequence</b>                       | <b>Type</b> | <b>Location</b> |
|-----------------------------------|---------------------------------------|-------------|-----------------|
| <b>SARS-CoV-2<br/>(N gene)</b>    | 5'-CACATTGGCACCCGCAATC-3'             | Forward     | 28701-28719     |
|                                   | 5'- GAGGAACGAGAAGAGGCTTG-3'           | Reverse     | 28789-28808     |
| <b>SARS-CoV-2<br/>(E gene)</b>    | 5'-ACAGGTACGTTAATAGTTAATAGCGT-3'      | Forward     | 26264-26289     |
|                                   | 5'- ATATTGCAGCAGTACGCACACA-3'         | Reverse     | 26306-26327     |
| <b>SARS-CoV-2<br/>(RdRp gene)</b> | 5'- GTGARATGGTCATGTGTGGCGG-3'         | Forward     | 15431 - 15452   |
|                                   | 5'-CARATGTTAAASACACTATTAGCATA-3'      | Reverse     | 15505 - 15530   |
| <b>HCoV-OC43<br/>(S gene)</b>     | 5'- AGTACTGCTATTTCTTGTTCAAACATGTG -3' | Forward     | 1123-1150       |
|                                   | 5'- GCTCTACGACTTCGTCTGTTTTTAGA -3'    | Reverse     | 1168-1193       |
| <b>PEDV<br/>(N gene)</b>          | 5'- GATCGTGGCCGCAAACG -3'             | Forward     | 26395-26411     |
|                                   | 5'- TGCCATTGCCACGACTCC -3'            | Reverse     | 26827-26844     |
