# Supplementary material for: Broad-Spectrum Antiviral Activity of 3D8, a Nucleic Acid-Hydrolyzing Single-Chain Variable Fragment (scFv), Targeting SARS-CoV-2 and Multiple Coronaviruses In Vitro
Source: MDPI journal article supplement (doi:10.3390/v13040650), 2021-04-09
Supplement: s1 [file s1]

## **Supplementary Data**

### **Broad-spectrum antiviral activity of 3D8, a nucleic acid-hydrolyzing single chain variable fragment (scFv), targeting SARS-CoV-2 and multiple coronaviruses**

**Gunsup Lee<sup>1¶</sup>, Shailesh Budhathoki<sup>2¶</sup>, Geum-Young Lee<sup>3</sup>, Kwang-ji Oh<sup>1</sup>, Yeon Kyoung Ham<sup>1</sup>, Young Jun Kim<sup>1</sup>, Ye Rin Lim<sup>1,4</sup>, Phuong Thi Hoang<sup>5</sup>, Yongjun Lee<sup>5</sup>, Seok-Won Lim<sup>6</sup>, Jun-Mo Kim<sup>6</sup>, Seungechan Cho<sup>3</sup>, Tai-Hyun Kim<sup>1</sup>, Jin-Won Song<sup>3</sup>, Sukchan Lee<sup>5\*</sup> and Won-Keun Kim<sup>2,4\*</sup>**

<sup>1</sup>Novelgen Co., Ltd., R&D center, 77, Changnyong-daero 256 beon-gil, Yeongtong-gu, Suwon-si, Gyeonggi-do, Republic of Korea

<sup>2</sup>Department of Microbiology, College of Medicine, Hallym University, Chuncheon, Republic of Korea

<sup>3</sup>Department of Microbiology, Korea University College of Medicine, Seoul, Republic of Korea

<sup>4</sup>Institute of Medical Science, College of Medicine, Hallym University, Chuncheon, Republic of Korea

<sup>5</sup>College of Biotechnology and Bioengineering, Sungkyunkwan University, Suwon, Republic of Korea

<sup>6</sup>Animal Functional Genomics & Bioinformatics Lab., Department of Animal Science and Technology, Chung-Ang University, Anseong, Gyeonggi-do, Republic of Korea

**Supplement table 1. Primers used for in vitro transcription viral spike gene amplification**

| <b>Primer</b>     | <b>Sequence</b>               | <b>Type</b> | <b>Accession No.</b> |
|-------------------|-------------------------------|-------------|----------------------|
| <b>SARS-CoV-2</b> | 5'- CAGATGCTGGCTTCATCAAA -3'  | Forward     | NC_045512            |
|                   | 5'- CATTGAGGCGGTCAATTTCT -3'  | Reverse     |                      |
| <b>HCoV-OC43</b>  | 5'- AGCTATACCCAATGGCAGGAA -3' | Forward     | NC_006213            |
|                   | 5'- CCAGTGGTAATCGCTCCAC -3'   | Reverse     |                      |
| <b>PEDV</b>       | 5'- TGTCTCTGCGTCTTTTGGTG -3'  | Forward     | NC_003436            |
|                   | 5'- CTGCCACTTGCAGGATCATA -3'  | Reverse     |                      |
